# Supplementary material
Source: PubMed Central journal article supplement (PMC6801030)

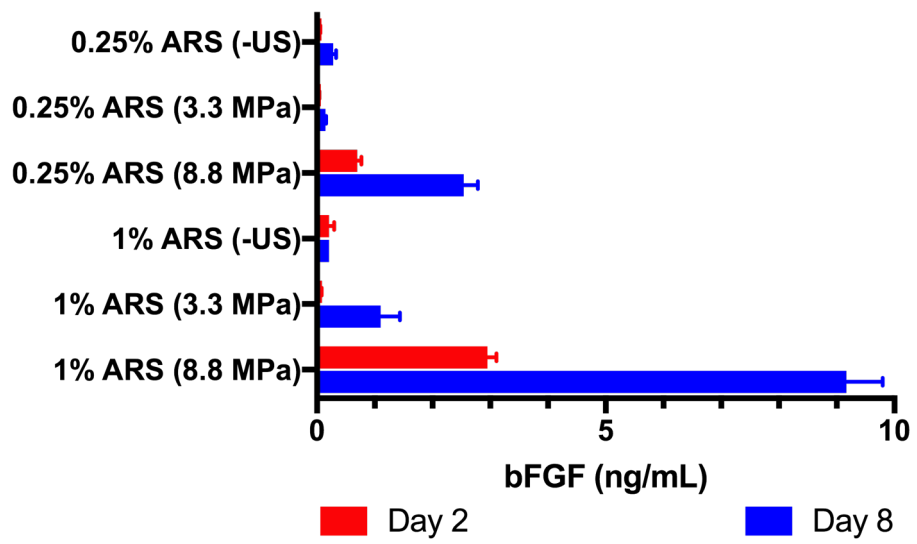

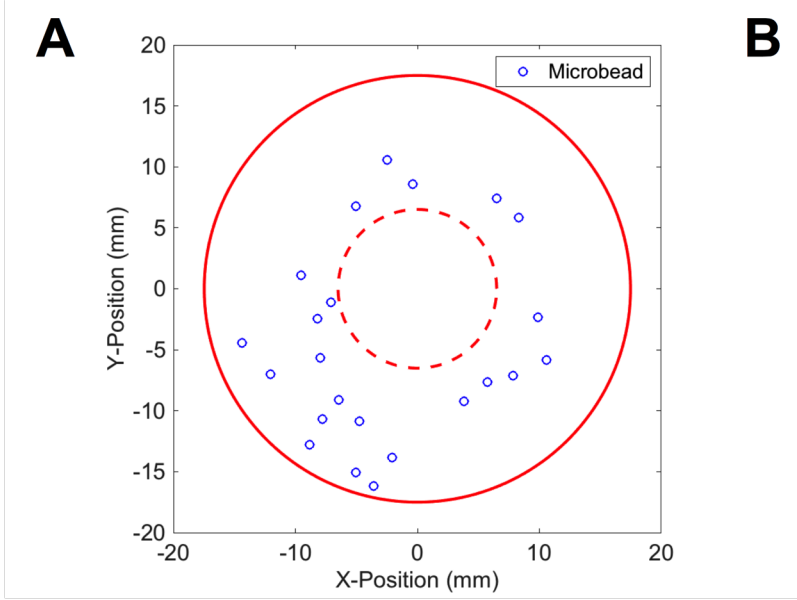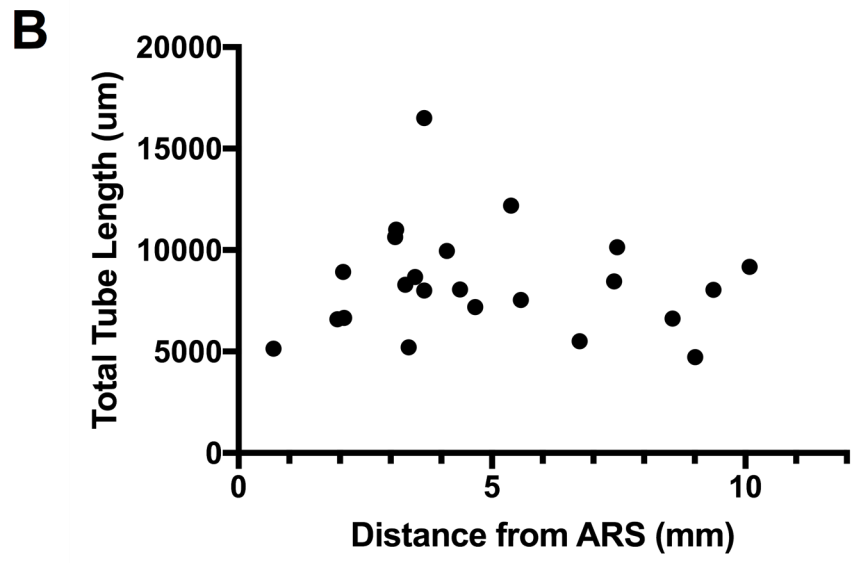

Supplement: NIHMS1537201-supplement-1.pdf [file NIHMS1537201-supplement-1.pdf]
